# Supplementary material for: The Impact of Photorespiratory Glycolate Oxidase Activity on Arabidopsis thaliana Leaf Soluble Amino Acid Pool Sizes during Acclimation to Low Atmospheric CO2 Concentrations
Source: MDPI journal article supplement (doi:10.3390/metabo11080501), 2021-07-30
Supplement: s1 [file s1]

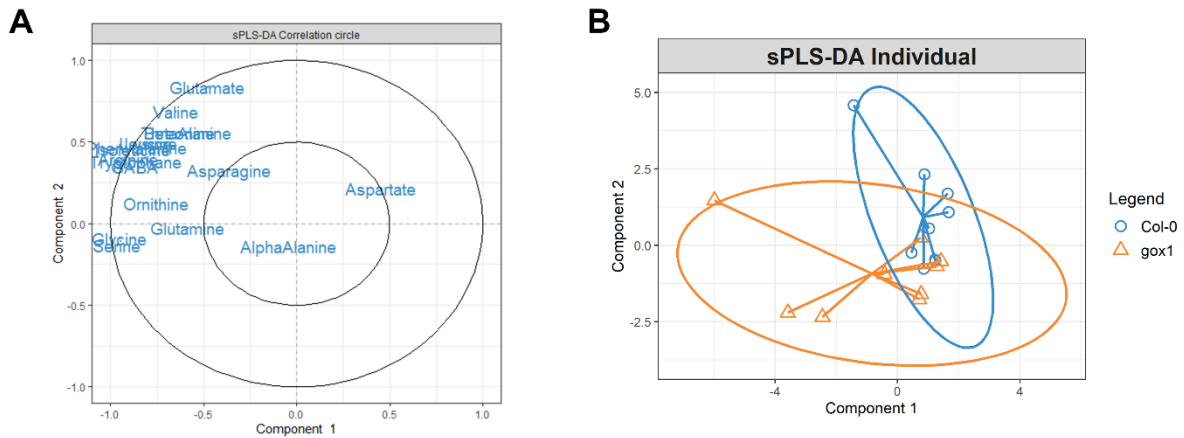

**Figure S1. Partial Least Square – Discriminant Analysis for amino acid contents of rosette leaves from Arabidopsis Col-0 and *gox1* mutant exposed to short-term low CO<sub>2</sub> treatments (180 and 100 ppm for 4 h). (A) Variable (amino acids) plot with correlation circle and (B) Individual (Col-0 and *gox1*) plot.**

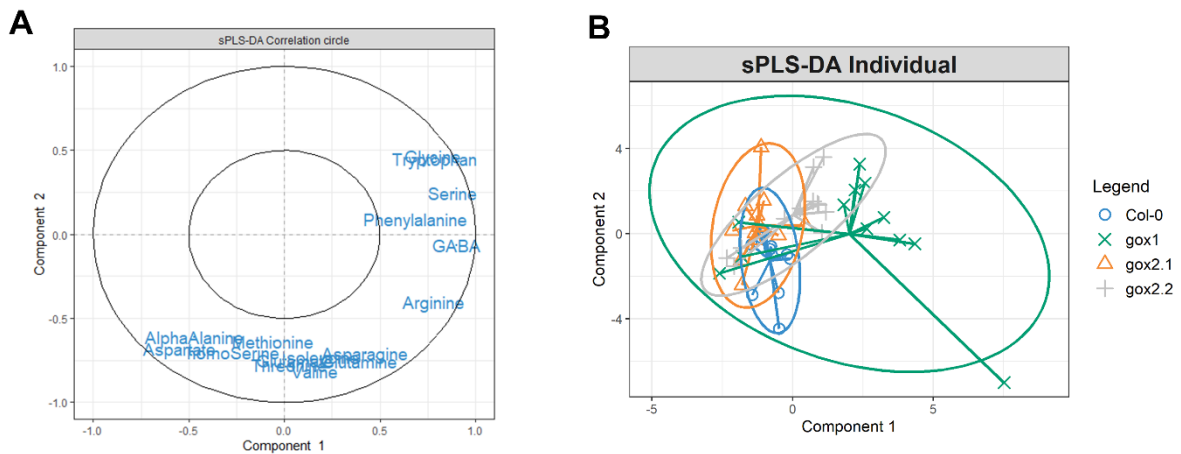

**Figure S2. Partial Least Square – Discriminant Analysis for amino acid contents of rosette leaves from Arabidopsis Col-0, *gox1* and *gox2* mutants exposed to a long-term low CO<sub>2</sub> treatment (200 ppm for 1, 4 and 8 days). (A) Variable (amino acids) plot with correlation circle and (B) Individual (Col-0, *gox1*, *gox2.1*, *gox2.2*) plot.**

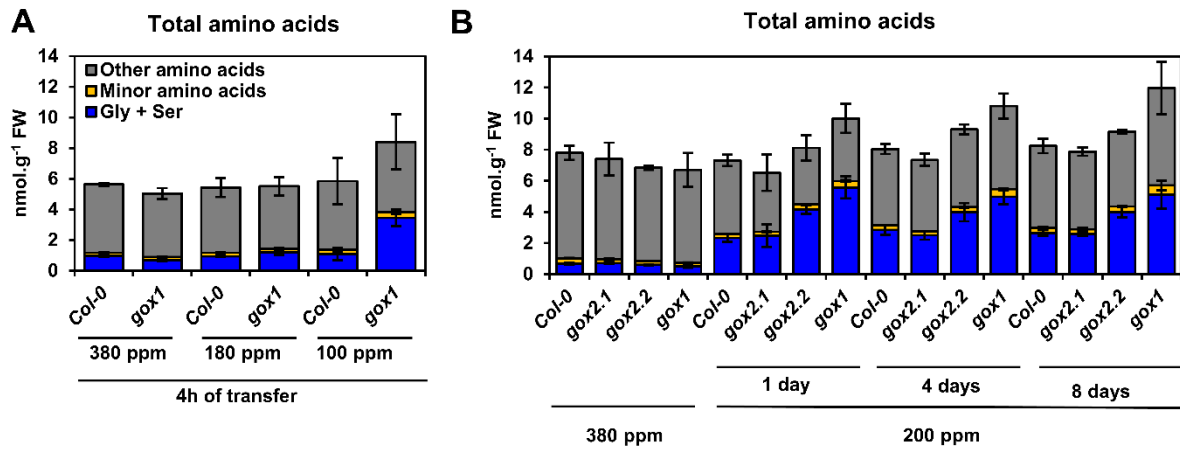

**Figure S3. Contribution of Gly and Ser to the variation of total soluble amino acids after either short or long-term exposures to low CO<sub>2</sub>.** (A) Amino acid contents of rosette leaves of *Arabidopsis* Col-0 and *gox1* mutant exposed to short-term low CO<sub>2</sub> treatments (180 and 100 ppm for 4 h) and (B) Amino acid contents of rosette leaves of *Arabidopsis* Col-0, *gox1* and *gox2.2* mutants exposed to a long-term low CO<sub>2</sub> treatment (200 ppm for 1, 4 and 8 days). Minor amino acids were identified based on their very low contribution to the total soluble leaf amino acid pool (below <2%).
