# Supplementary material for: The Impact of Photorespiratory Glycolate Oxidase Activity on Arabidopsis thaliana Leaf Soluble Amino Acid Pool Sizes during Acclimation to Low Atmospheric CO2 Concentrations
Source: Metabolites. 2021 Jul 30;11(8):501. doi: 10.3390/metabo11080501 (PMC8399254; doi:10.3390/metabo11080501)
Supplement: Supplementary file 1 [file metabolites-11-00501-s001.zip › Supplemental tables S1-S4.xlsx]

## Sheet: Table S1
Table S1. Complete dataset of free amino acid contents of rosette leaves from Arabidopsis Col-0 and a gox1 mutant exposed to short-term low CO2 treatments (180 and 100 ppm for 4 h).
Results are expressed in pmol.g-1 FW, except for the ratios
Conditions	Genotypes	AlphaAlanine	Arginine	Asparagine	Aspartate	BetaAlanine	GABA	Glutamine	Glutamate	Glycine	Isoleucine	Leucine	Lysine	Ornithine	Phenylalanine	Serine	Threonine	Tryptophan	Valine	Total amino acids	Glycine/Serine	Glutamate/Glutamine	Aspartate/Asparagine
380 ppm	Col-0	283.169	0	255.02	824.958	20.7175	0	1137.42	1438.82	146.837	28.9902	15.1901	10.3705	16.7743	21.2128	877.343	425.77	20.9218	55.6005	5579.12	0.167366	1.26498	3.23488
380 ppm	Col-0	355.765	0	287.734	805.516	18.8402	0	1335.14	1366.18	146.155	30.7508	15.2253	11.1422	19.4242	20.5955	768.717	401.991	24.522	61.8611	5669.55	0.190128	1.02325	2.79952
380 ppm	Col-0	354.177	3.23778	333.926	736.938	20.4359	0.163941	1304.91	1287.35	159.014	35.0451	17.57	13.5275	21.5897	23.557	786.094	441.103	25.1634	67.5298	5631.33	0.202284	0.986543	2.20689
380 ppm	gox1	293.049	0	253.328	1030.04	23.31	0	1121.13	1442.37	143.927	29.7403	14.1201	11.6907	17.9824	19.7951	575.591	387.461	23.3536	53.7281	5440.61	0.25005	1.28653	4.06604
380 ppm	gox1	341.396	0	211.317	860.369	21.966	0	1038.94	1252.47	143.652	29.846	15.6136	9.583	17.1305	22.5451	575.278	396.574	23.6806	58.818	5019.18	0.24971	1.20553	4.07146
380 ppm	gox1	334.473	0	145.63	884.733	23.9193	0	868.136	1255.78	120.585	31.9769	16.0307	13.2195	25.0331	20.799	497.18	332.579	18.287	58.9873	4647.35	0.242538	1.44652	6.07522
180 ppm	Col-0	210.409	5.73494	462.009	673.61	41.0976	1.41049	1176.4	1926.02	198.145	38.1352	22.2878	16.6499	20.3017	24.2886	715.349	441.046	30.8964	71.5705	6075.36	0.27699	1.63722	1.458
180 ppm	Col-0	155.111	0	161.079	625.702	24.7734	0.256535	828.076	1512.97	267.04	29.7886	13.5501	10.9407	17.7041	23.3813	678.131	402.369	26.9113	50.2431	4828.03	0.393789	1.82709	3.88443
180 ppm	Col-0	183.769	0	299.544	618.082	26.0422	0.275931	1055.52	1617.04	247.848	34.0811	19.7247	13.3117	18.6049	24.8856	688.634	419.466	30.1097	58.2613	5355.2	0.359912	1.53199	2.06341
180 ppm	gox1	168.225	0.825966	199.999	648.396	26.2821	0.229205	981.004	1621.52	265.533	36.1854	24.1708	18.7247	17.8336	25.0937	753.577	407.491	28.4063	59.1645	5282.66	0.352364	1.65292	3.242
180 ppm	gox1	204.144	2.36916	255.87	735.598	43.7567	0.448878	1647.74	1367.87	388.006	33.8679	16.5505	13.8356	19.5249	27.0612	961.749	485.551	35.3061	53.0982	6292.35	0.403438	0.830151	2.87489
180 ppm	gox1	148.894	0	135.283	621.67	27.8396	1.67146	890.353	1346.26	390.105	27.8368	13.7153	13.9498	17.0378	19.3109	856.661	365.269	24.7333	40.8744	4941.46	0.455378	1.51205	4.59535
100 ppm	Col-0	114.423	0.238674	132.426	381.022	36.7749	0	489.728	1984.57	210.001	37.5607	27.0801	25.4601	14.2552	23.6154	515.825	324.592	23.9496	67.3252	4408.85	0.407117	4.0524	2.87723
100 ppm	Col-0	123.205	0.937383	153.866	455.605	37.6047	0	732.633	1914.8	340.882	32.0358	17.9612	15.9943	11.7964	24.9411	623.226	385.153	24.8792	58.1956	4953.71	0.546964	2.61358	2.96106
100 ppm	Col-0	229.004	13.9004	210.237	952.672	42.2004	15.179	887.106	3339.02	654.131	52.4672	32.8787	33.7247	26.8578	41.7075	872.09	602.662	67.435	98.1811	8171.46	0.750072	3.76395	4.53141
100 ppm	gox1	194.373	8.86826	205.892	213.846	29.3111	9.69962	1022.24	1592.11	1530.85	46.1731	30.98	26.8038	23.9779	33.2449	1827.1	396.782	51.1131	68.5256	7311.89	0.837859	1.55747	1.03863
100 ppm	gox1	170.792	6.8596	183.549	234.707	27.7162	7.03697	987.274	1500.72	1364.54	41.0179	22.1083	20.2394	21.3713	28.2351	1588	413.562	46.5233	57.7346	6721.98	0.859279	1.52007	1.27872
100 ppm	gox1	284.357	24.3807	458.091	474.12	58.2958	14.4369	2092.44	2751.73	1712.09	63.5412	41.7099	41.1902	27.8209	48.4386	2324.93	597.734	63.5361	101.845	11180.7	0.736405	1.31508	1.03499

## Sheet: Table S2
Table S2. Complete dataset of free amino acid contents of rosette leaves from Arabidopsis Col-0, gox1 and gox2 mutants exposed to a long-term low CO2 treatment (200 ppm) for 1, 4 and 8 days.
Results are expressed in pmol.g-1 FW, except for the ratios
Conditions	Genotypes	AlphaAlanine	Arginine	Asparagine	Aspartate	GABA	Glutamine	Glutamate	Glycine	homoSerine	Isoleucine	Methionine	Phenylalanine	Serine	Threonine	Tryptophan	Valine	Total amino acids	Glycine/Serine	Glutamate/Glutamine	Aspartate/Asparagine
380 ppm	Col-0	978.837	106.973	903.345	909.237	43.5289	2277.8	1671.81	222.648	14.9356	25.1977	6.29074	21.7109	449.638	392.417	14.2481	97.0958	8135.71	0.495173	0.733958	1.00652
380 ppm	Col-0	867.787	132.176	870.849	798.859	32.4116	2403.25	1526.66	214.92	17.0481	31.8392	5.69027	31.7731	517.361	510.008	16.1118	111.4	8088.14	0.415417	0.63525	0.917332
380 ppm	Col-0	907.567	108.377	747.155	691.569	19.2155	2024.24	1400.27	154.751	15.0278	27.0029	3.80656	25.283	439.793	489.4	8.45889	112.868	7174.79	0.351872	0.691748	0.925603
380 ppm	gox2.1	984.033	78.3892	506.229	595.409	16.2441	1829.42	1275.22	246.883	13.9887	18.0518	2.9879	14.0758	453.31	349.651	8.26228	80.9261	6473.08	0.544622	0.697059	1.17616
380 ppm	gox2.1	1231.37	93.6275	542.226	712.636	21.6126	1963.09	1328.58	298.445	14.2872	21.4921	5.57459	20.3517	471.471	375.454	13.9257	91.8546	7206	0.63301	0.676777	1.31428
380 ppm	gox2.1	1097.26	96.1566	851.079	1146.25	25.8214	2269.01	1833.84	206.057	14.5212	18.9974	7.12697	11.6096	450.713	395.704	12.0343	80.9001	8517.08	0.45718	0.808214	1.34682
380 ppm	gox2.2	904.262	89.1537	638.463	632.531	17.6386	1899.2	1366.76	159.836	13.1465	20.454	2.69647	18.4786	428.914	399.272	9.11689	86.921	6686.84	0.372653	0.719651	0.990709
380 ppm	gox2.2	966.962	87.3071	665.698	781.478	17.4904	1723.02	1563.22	143.343	11.3796	22.0596	5.39307	15.7072	476.102	412.727	6.43578	96.4401	6994.76	0.301076	0.907254	1.17392
380 ppm	gox2.2	860.321	89.5246	666.939	799.62	16.5375	1753.97	1494.17	135.47	13.1907	18.4174	3.08102	10.2078	448.04	450.779	5.70765	83.5672	6849.55	0.302362	0.851879	1.19894
380 ppm	gox1	962.782	77.3943	674.427	1098.05	17.9415	1921.33	1696.35	138.798	11.6829	19.1846	6.8013	10.702	375.938	405.94	6.2572	85.2438	7508.82	0.369203	0.882903	1.62812
380 ppm	gox1	700.431	80.2915	567.986	497.359	19.9054	1573.72	1072.9	91.3158	10.9382	20.0145	4.02667	19.0588	307.611	323.636	6.15572	73.735	5369.08	0.296855	0.681763	0.875654
380 ppm	gox1	1005.48	95.3101	619.758	809.693	22.5889	2151.18	1478.18	216.334	16.2237	19.6771	5.53059	14.9151	357.809	339.102	13.8321	76.8821	7242.49	0.604607	0.687151	1.30647
1 day 200 ppm	Col-0	244.659	77.8427	355.385	385.136	24.7714	1849.03	1275.37	1802.19	9.22933	14.492	4.87325	37.6036	777.253	475.882	54.3856	50.0788	7438.18	2.31866	0.689751	1.08371
1 day 200 ppm	Col-0	345	74.7531	354.874	338.812	31.4093	1798.21	1133.83	1476.98	7.58038	14.8082	4.76525	39.5129	856.273	453.723	36.3952	56.4441	7023.37	1.7249	0.63053	0.954737
1 day 200 ppm	Col-0	352.006	81.2032	393.667	576.764	29.3138	1950.19	1391.57	1152.11	7.29438	13.1465	5.83927	32.9473	921.814	465.909	30.8562	51.2857	7455.92	1.24983	0.713556	1.46511
1 day 200 ppm	gox2.1	151.967	54.0132	200.821	208.67	13.3252	723.752	934.026	2671.99	6.7415	18.1979	1.4859	39.5891	630.257	264.857	59.7604	45.0614	6024.51	4.23952	1.29053	1.03908
1 day 200 ppm	gox2.1	296.587	83.9239	361.999	491.56	28.502	1858.69	1253.55	1249.67	7.99098	13.0621	5.31	36.4292	968.792	447.718	32.0055	46.1936	7181.98	1.28993	0.674423	1.3579
1 day 200 ppm	gox2.1	328.685	72.1536	325.405	485.524	28.373	1503.66	1165.86	1059.76	6.20814	11.3883	4.93172	31.1438	867.63	384.97	28.6233	43.4183	6347.73	1.22144	0.775349	1.49206
1 day 200 ppm	gox2.2	216.528	104.354	472.769	327.493	41.8032	1779.02	1290.26	2315.68	7.87052	13.5624	3.4257	47.1018	1724.8	396.006	63.623	45.1633	8849.47	1.34258	0.725263	0.692713
1 day 200 ppm	gox2.2	238.781	96.0821	353.844	258.428	36.2837	1284.82	1096.86	2949.49	7.6025	13.4722	1.80263	47.2329	1502.44	323.771	71.4388	45.5773	8327.92	1.96313	0.853704	0.730346
1 day 200 ppm	gox2.2	208.19	110.078	297.015	231.675	46.2033	914.361	988.237	2604.23	5.56039	16.5598	4.33405	47.1181	1325.66	236.893	83.4493	50.8787	7170.45	1.96448	1.08079	0.780011
1 day 200 ppm	gox1	237.291	117.342	520.127	204.891	48.93	1496.78	1036.79	2569.75	4.9996	17.2071	2.78494	44.3181	2318.43	352.973	64.6856	75.103	9112.4	1.1084	0.692685	0.393925
1 day 200 ppm	gox1	301.916	155.335	703.068	274.857	65.7385	1922.41	1326.08	2669.89	9.51656	25.9519	1.28397	56.4732	3622.42	491.649	73.6341	94.2308	11794.5	0.737045	0.6898	0.390939
1 day 200 ppm	gox1	215.371	137.666	436.1	197.125	47.3525	1119.17	921.186	3362.39	3.8437	18.1815	3.00741	44.0539	2154.82	293.87	80.3998	59.5373	9094.08	1.5604	0.8231	0.452017
4 days 200 ppm	Col-0	443.192	67.9701	252.379	515.609	41.8737	1698.19	1173.33	2267.29	9.07256	16.4428	5.88459	62.333	777.831	475.451	52.2796	63.8447	7922.98	2.91489	0.690933	2.043
4 days 200 ppm	Col-0	391.11	87.8366	324.828	652.48	35.4816	1830.7	1538.91	2014.84	10.7404	17.0207	6.57117	61.9313	960.338	456.189	52.9784	58.6392	8500.59	2.09805	0.840613	2.00869
4 days 200 ppm	Col-0	412.365	77.7601	326.683	486.993	35.9547	1798.27	1405.31	1568.17	11.1091	18.7433	4.33084	64.584	917.17	468.383	41.122	62.2636	7699.21	1.7098	0.78148	1.49072
4 days 200 ppm	gox2.1	265.105	68.4296	323.22	468.492	30.9987	1723.34	1254.89	1503.65	10.2177	14.5296	4.24088	49.7817	861.44	431.149	41.9253	48.8738	7100.28	1.74551	0.728172	1.44945
4 days 200 ppm	gox2.1	369.017	76.3397	350.265	668.815	28.9168	1837.12	1350.52	1424.24	8.51318	14.3744	6.09661	48.6021	882.448	428.563	37.5277	59.8054	7591.15	1.61396	0.735128	1.90946
4 days 200 ppm	gox2.1	374.665	63.1053	256.243	440.343	26.9482	1532.51	1262.93	1831.67	10.8776	14.345	2.46986	62.5476	981.566	371.874	43.0292	50.9674	7326.09	1.86607	0.824095	1.71846
4 days 200 ppm	gox2.2	392.307	75.3603	347.978	543.441	38.0349	1749.64	1365.85	2049.7	9.45715	13.8487	4.47137	60.6734	1309.44	393.233	46.4488	55.3004	8455.18	1.56533	0.780648	1.56171
4 days 200 ppm	gox2.2	369.12	89.6733	484.754	508.558	43.2983	1901.71	1698.59	2697.29	7.61326	17.2275	5.81721	74.3814	1832.84	404.077	59.1694	56.4725	10250.6	1.47165	0.893189	1.0491
4 days 200 ppm	gox2.2	377.142	73.5824	374.134	441.003	34.2857	1841.32	1419.62	2350.11	11.2068	14.1004	3.11401	66.4119	1707.88	375.916	50.659	53.3286	9193.83	1.37604	0.770981	1.17873
4 days 200 ppm	gox1	243.832	279.303	856.046	430.345	44.6509	2349.43	1621.74	3230.1	8.60408	15.8749	5.96369	80.0838	2294.54	402.602	80.0344	50.8971	11994	1.40774	0.69027	0.502713
4 days 200 ppm	gox1	206.278	204.63	532.939	304.022	41.6391	1911.32	1180.35	2445.88	8.9035	12.8225	3.08802	81.6528	2211.91	294.75	67.4478	43.8286	9551.47	1.10578	0.617556	0.570463
4 days 200 ppm	gox1	271.878	225.355	765.142	409.563	40.856	2424	1454.21	2698.6	7.49862	14.7569	5.7164	7.83856	2046.57	365.352	70.6731	61.589	10869.6	1.3186	0.599923	0.535277
8 days 200 ppm	Col-0	347.93	135.351	468.479	487.16	35.3611	2287.17	1502.79	1710.77	8.26918	17.2488	3.32265	56.3996	829.452	501.423	42.8243	64.5689	8498.52	2.06253	0.657054	1.03988
8 days 200 ppm	Col-0	275.351	75.7032	311.029	483.927	31.1583	1709.86	1487.35	1669.7	8.11392	18.0799	3.20292	55.5648	875.976	456.43	43.8145	51.2539	7556.51	1.9061	0.869868	1.55589
8 days 200 ppm	Col-0	431.596	116.355	412.033	508.021	34.1165	2217.36	1416.45	1924.72	7.62779	15.6778	5.41025	63.884	933.212	468.573	44.5308	68.2939	8667.87	2.06247	0.638801	1.23296
8 days 200 ppm	gox2.1	335.776	82.1785	378.174	536.507	43.2316	2153.47	1287.96	1532.53	7.44016	12.542	4.40486	58.4225	919.883	442.686	39.4567	50.6691	7885.33	1.666	0.598084	1.41868
8 days 200 ppm	gox2.1	336.079	179.876	531.213	487.524	35.4771	1942.04	1450.76	1573.97	7.52394	14.2797	3.99682	65.1611	1022.11	389.141	42.6446	56.0449	8137.83	1.53993	0.747026	0.917756
8 days 200 ppm	gox2.1	384.341	74.5233	297.047	582.813	29.9959	1548.64	1463.83	1622.18	6.72327	12.5714	4.48949	56.5542	1011.98	409.199	38.324	48.283	7591.49	1.60297	0.945237	1.96202
8 days 200 ppm	gox2.2	284.222	95.2771	441.158	417.081	38.4071	1883.07	1532.84	3013.12	8.39487	15.779	3.65212	82.1952	1325.62	374.614	83.1069	59.6137	9658.15	2.273	0.814013	0.945422
8 days 200 ppm	gox2.2	353.507	76.7549	390.547	380.385	39.8757	1691.99	1474.21	2671.47	8.92803	15.0184	2.45132	73.0068	1258.76	375.465	80.5089	54.3426	8947.22	2.12231	0.87129	0.973979
8 days 200 ppm	gox2.2	303.771	121.712	492.723	404.613	42.9768	1880.88	1384.9	2295.98	5.47172	11.9276	5.5108	67.8109	1390.39	334.976	52.9654	44.3473	8840.95	1.65132	0.736306	0.821177
8 days 200 ppm	gox1	549.98	466.808	1290.71	519.821	76.7619	3370.03	1874.33	3101.11	13.334	35.4443	7.91549	116.8	2280.19	583.07	75.815	164.393	14526.5	1.36002	0.556176	0.402741
8 days 200 ppm	gox1	277.342	87.3862	651.739	240.338	51.8523	2653.97	1268.34	3853.75	11.3449	14.5732	3.77507	98.3928	2008.92	374.37	97.3687	49.0784	11742.5	1.91832	0.477902	0.368765
8 days 200 ppm	gox1	339.143	155.206	579.607	289.264	41.259	2381.9	1166.77	2554.76	8.26276	11.8542	2.69849	67.1909	1534.03	354.719	58.355	52.4883	9597.51	1.66539	0.489848	0.49907

## Sheet: Table S3
Table S3. Free amino acid contents of rosette leaves from Arabidopsis Col-0 and a gox1 mutant exposed to short-term low CO2 treatments (180 and 100 ppm for 4 h) expressed as percentages of leaf total soluble amino acids.
Conditions	Genotypes	AlphaAlanine	Arginine	Asparagine	Aspartate	BetaAlanine	GABA	Glutamine	Glutamate	Glycine	Isoleucine	Leucine	Lysine	Ornithine	Phenylalanine	Serine	Threonine	Tryptophan	Valine	Total amino acids
380 ppm	Col-0	5.0755	0	4.57097	14.7865	0.371339	0	20.3872	25.7894	2.63191	0.519619	0.272267	0.18588	0.300661	0.380217	15.7255	7.63148	0.375001	0.996582	100
380 ppm	Col-0	6.27502	0	5.07507	14.2078	0.332306	0	23.5492	24.0967	2.57789	0.542385	0.268545	0.196526	0.342606	0.363264	13.5587	7.09035	0.432521	1.09111	100
380 ppm	Col-0	6.2894	0.0574958	5.92979	13.0864	0.362897	0.00291123	23.1723	22.8605	2.82374	0.622323	0.312004	0.240219	0.383385	0.418321	13.9593	7.83302	0.446846	1.19918	100
380 ppm	gox1	5.38633	0	4.65624	18.9325	0.428444	0	20.6066	26.5111	2.64542	0.546636	0.259531	0.214879	0.330522	0.363839	10.5795	7.12164	0.429246	0.987537	100
380 ppm	gox1	6.80182	0	4.21019	17.1416	0.437641	0	20.6993	24.9537	2.86207	0.594638	0.311079	0.190928	0.341301	0.449179	11.4616	7.90117	0.471802	1.17187	100
380 ppm	gox1	7.19707	0	3.13361	19.0374	0.514687	0	18.6802	27.0214	2.5947	0.688068	0.344943	0.284452	0.538654	0.447545	10.6981	7.15633	0.393493	1.26927	100
180 ppm	Col-0	3.46331	0.0943967	7.60464	11.0876	0.676464	0.0232166	19.3634	31.7022	3.26145	0.627703	0.366857	0.274056	0.334164	0.399789	11.7746	7.25959	0.508553	1.17805	100
180 ppm	Col-0	3.21273	0	3.33634	12.9598	0.513117	0.00531346	17.1514	31.3372	5.53105	0.616994	0.280654	0.226608	0.366693	0.484283	14.0457	8.33403	0.557397	1.04066	100
180 ppm	Col-0	3.4316	0	5.59352	11.5417	0.486297	0.00515258	19.7102	30.1957	4.62817	0.636411	0.368328	0.248575	0.347417	0.464699	12.8591	7.83286	0.562252	1.08794	100
180 ppm	gox1	3.18448	0.0156354	3.78595	12.274	0.497517	0.00433881	18.5703	30.6951	5.02651	0.684984	0.45755	0.354456	0.337587	0.47502	14.2651	7.71374	0.537726	1.11998	100
180 ppm	gox1	3.24433	0.0376515	4.06637	11.6904	0.695396	0.00713372	26.1864	21.7387	6.16631	0.53824	0.263027	0.21988	0.310296	0.430065	15.2844	7.71654	0.561096	0.843854	100
180 ppm	gox1	3.01316	0	2.7377	12.5807	0.563387	0.0338252	18.018	27.2441	7.89453	0.563332	0.277556	0.282302	0.344792	0.390794	17.3362	7.39192	0.500527	0.827173	100
100 ppm	Col-0	2.59531	0.00541352	3.00365	8.6422	0.834116	0	11.1078	45.0134	4.76318	0.851938	0.614221	0.577478	0.323332	0.535637	11.6998	7.36228	0.543216	1.52705	100
100 ppm	Col-0	2.48712	0.0189228	3.10607	9.19724	0.759121	0	14.7896	38.6538	6.88135	0.646704	0.362581	0.322874	0.238132	0.503483	12.581	7.77505	0.502233	1.17479	100
100 ppm	Col-0	2.80248	0.170109	2.57283	11.6585	0.516436	0.185757	10.8562	40.862	8.00506	0.642078	0.40236	0.412714	0.328678	0.510405	10.6724	7.3752	0.82525	1.20151	100
100 ppm	gox1	2.65832	0.121285	2.81585	2.92463	0.400869	0.132655	13.9805	21.7742	20.9365	0.631479	0.423693	0.366578	0.32793	0.454669	24.9881	5.42653	0.69904	0.93718	100
100 ppm	gox1	2.5408	0.102047	2.73057	3.49163	0.412322	0.104686	14.6872	22.3256	20.2996	0.610206	0.328896	0.301092	0.317931	0.420042	23.624	6.15238	0.692107	0.858892	100
100 ppm	gox1	2.54329	0.218061	4.09716	4.24053	0.521397	0.129124	18.7148	24.6114	15.3129	0.568312	0.373053	0.368405	0.24883	0.433234	20.7942	5.34613	0.568266	0.910897	100

## Sheet: Table S4
Table S4. Free amino acid contents of rosette leaves from Arabidopsis Col-0, gox1 and gox2 mutants exposed to a long-term low CO2 treatment (200 ppm) for 1, 4 and 8 days expressed as percentages of total leaf soluble amino acids.
Conditions	Genotypes	Ala	Arg	Asn	Asp	GABA	Gln	Glu	Gly	hSer	Ile	Met	Phe	Ser	Thr	Trp	Val	Total
380 ppm	Col-0	12.0314	1.31486	11.1035	11.1759	0.535035	27.9975	20.549	2.73668	0.183581	0.309718	0.0773226	0.26686	5.52672	4.82339	0.17513	1.19345	100
380 ppm	Col-0	10.7291	1.63419	10.767	9.87691	0.40073	29.7132	18.8753	2.65723	0.210779	0.393652	0.0703532	0.392836	6.39654	6.30562	0.199202	1.37733	100
380 ppm	Col-0	12.6494	1.51052	10.4136	9.63888	0.26782	28.2133	19.5165	2.15687	0.209453	0.376359	0.0530546	0.352387	6.1297	6.82111	0.117897	1.57312	100
380 ppm	gox2.1	15.2019	1.211	7.82053	9.19822	0.250949	28.262	19.7003	3.81399	0.216106	0.278876	0.0461589	0.217451	7.003	5.40162	0.127641	1.25019	100
380 ppm	gox2.1	17.0882	1.2993	7.52465	9.88947	0.299924	27.2425	18.4371	4.14162	0.198268	0.298252	0.0773603	0.282427	6.54275	5.21029	0.193252	1.27469	100
380 ppm	gox2.1	12.883	1.12898	9.99262	13.4583	0.303172	26.6407	21.5314	2.41934	0.170494	0.22305	0.0836785	0.136309	5.29187	4.646	0.141296	0.949857	100
380 ppm	gox2.2	13.523	1.33327	9.54806	9.45935	0.263781	28.402	20.4395	2.3903	0.196603	0.305884	0.0403251	0.276343	6.4143	5.97102	0.136341	1.29988	100
380 ppm	gox2.2	13.8241	1.24818	9.5171	11.1723	0.25005	24.633	22.3484	2.04929	0.162688	0.315374	0.0771016	0.224556	6.80656	5.90051	0.0920087	1.37875	100
380 ppm	gox2.2	12.5603	1.30701	9.73698	11.6741	0.241439	25.6071	21.8142	1.9778	0.192577	0.268885	0.0449813	0.149029	6.54115	6.58115	0.0833288	1.22004	100
380 ppm	gox1	12.822	1.03071	8.9818	14.6234	0.238939	25.5876	22.5914	1.84846	0.15559	0.255494	0.0905775	0.142526	5.00663	5.40618	0.0833314	1.13525	100
380 ppm	gox1	13.0456	1.49544	10.5788	9.26339	0.370742	29.3107	19.983	1.70077	0.203727	0.372773	0.0749973	0.354974	5.7293	6.02777	0.114651	1.37332	100
380 ppm	gox1	13.883	1.31599	8.55725	11.1798	0.311894	29.7022	20.4099	2.98701	0.224008	0.27169	0.0763631	0.205939	4.94041	4.68211	0.190986	1.06154	100
1 day 200 ppm	Col-0	3.28923	1.04653	4.77785	5.17783	0.333031	24.8587	17.1463	24.2289	0.12408	0.194833	0.0655167	0.505549	10.4495	6.39783	0.731167	0.673266	100
1 day 200 ppm	4d Col-0	4.91217	1.06435	5.05276	4.82406	0.447211	25.6033	16.1436	21.0295	0.107931	0.210842	0.0678484	0.562591	12.1918	6.46019	0.518201	0.80366	100
1 day 200 ppm	Col-0	4.72116	1.08911	5.27993	7.73565	0.393162	26.1563	18.664	15.4522	0.0978334	0.176323	0.0783173	0.441894	12.3635	6.24885	0.413849	0.687853	100
1 day 200 ppm	gox2.1	2.52248	0.896557	3.3334	3.46368	0.221184	12.0135	15.5038	44.3519	0.111901	0.302065	0.0246642	0.657133	10.4615	4.39632	0.991954	0.747968	100
1 day 200 ppm	gox2.1	4.12959	1.16853	5.04038	6.84435	0.396854	25.8799	17.454	17.4001	0.111264	0.181873	0.073935	0.50723	13.4892	6.2339	0.445636	0.643187	100
1 day 200 ppm	gox2.1	5.17798	1.13668	5.12632	7.64878	0.446978	23.6881	18.3666	16.6951	0.0978009	0.179408	0.0776925	0.490628	13.6683	6.06469	0.450921	0.683997	100
1 day 200 ppm	gox2.2	2.44679	1.17921	5.34234	3.70071	0.472381	20.1032	14.5801	26.1674	0.0889378	0.153256	0.0387108	0.532255	19.4905	4.47491	0.718947	0.51035	100
1 day 200 ppm	gox2.2	2.86724	1.15373	4.24888	3.10315	0.435688	15.4279	13.1709	35.4168	0.0912892	0.161771	0.0216456	0.567163	18.041	3.88777	0.857823	0.547283	100
1 day 200 ppm	gox2.2	2.90345	1.53516	4.14221	3.23097	0.644357	12.7518	13.7821	36.319	0.077546	0.230945	0.0604432	0.657116	18.4878	3.30374	1.16379	0.709561	100
1 day 200 ppm	gox1	2.60405	1.28771	5.7079	2.24848	0.53696	16.4257	11.3778	28.2006	0.0548659	0.188831	0.0305621	0.486349	25.4426	3.87354	0.709863	0.824184	100
1 day 200 ppm	gox1	2.55981	1.31702	5.961	2.33039	0.557367	16.2993	11.2433	22.6368	0.0806867	0.220035	0.0108863	0.478812	30.7129	4.16848	0.624311	0.798941	100
1 day 200 ppm	gox1	2.36826	1.5138	4.79543	2.16762	0.520697	12.3065	10.1295	36.9734	0.0422659	0.199926	0.03307	0.484424	23.6948	3.23145	0.88409	0.654682	100
4 days 200 ppm	Col-0	5.59375	0.857885	3.1854	6.50777	0.52851	21.4337	14.8093	28.6167	0.114509	0.207533	0.0742724	0.786737	9.81741	6.00091	0.659848	0.805817	100
4 days 200 ppm	Col-0	4.60098	1.0333	3.82124	7.67571	0.417402	21.5361	18.1036	23.7023	0.126349	0.20023	0.0773024	0.728553	11.2973	5.36656	0.623232	0.689825	100
4 days 200 ppm	Col-0	5.35594	1.00997	4.24307	6.32523	0.466992	23.3565	18.2526	20.368	0.144288	0.243444	0.0562504	0.83884	11.9125	6.08351	0.534106	0.808701	100
4 days 200 ppm	gox2.1	3.73373	0.96376	4.55222	6.59822	0.436585	24.2714	17.6738	21.1773	0.143905	0.204634	0.0597284	0.701123	12.1325	6.07228	0.590473	0.688336	100
4 days 200 ppm	gox2.1	4.86115	1.00564	4.61412	8.81045	0.380928	24.2008	17.7907	18.7618	0.112146	0.189357	0.080312	0.640246	11.6247	5.64556	0.494361	0.78783	100
4 days 200 ppm	gox2.1	5.11411	0.861377	3.49768	6.01061	0.367839	20.9185	17.2388	25.002	0.148477	0.195807	0.0337132	0.853765	13.3982	5.07602	0.587341	0.695697	100
4 days 200 ppm	gox2.2	4.63985	0.891291	4.11556	6.42731	0.449841	20.6931	16.154	24.2419	0.11185	0.163789	0.0528832	0.717588	15.4868	4.65079	0.549353	0.654041	100
4 days 200 ppm	gox2.2	3.60096	0.874811	4.72904	4.96125	0.422398	18.5522	16.5706	26.3135	0.0742714	0.168063	0.05675	0.725631	17.8804	3.94199	0.577229	0.550919	100
4 days 200 ppm	gox2.2	4.10212	0.800346	4.0694	4.79673	0.372921	20.0278	15.4411	25.5619	0.121895	0.153368	0.0338707	0.722353	18.5764	4.08878	0.55101	0.580048	100
4 days 200 ppm	gox1	2.03294	2.32868	7.13726	3.58799	0.372276	19.5883	13.5212	26.9309	0.0717363	0.132357	0.0497221	0.667696	19.1306	3.35668	0.667285	0.424353	100
4 days 200 ppm	gox1	2.15964	2.14239	5.57966	3.18299	0.435945	20.0108	12.3578	25.6074	0.093216	0.134246	0.0323304	0.854871	23.1578	3.08591	0.706151	0.458867	100
4 days 200 ppm	gox1	2.50127	2.07325	7.03929	3.76797	0.375874	22.3007	13.3787	24.827	0.0689871	0.135763	0.0525907	0.0721145	18.8284	3.36123	0.65019	0.566617	100
8 days 200 ppm	Col-0	4.094	1.59264	5.51248	5.73229	0.416086	26.9126	17.683	20.1302	0.0973014	0.202962	0.0390968	0.66364	9.75996	5.90013	0.503904	0.759767	100
8 days 200 ppm	Col-0	3.64389	1.00183	4.11604	6.40411	0.412337	22.6276	19.683	22.0961	0.107377	0.239263	0.0423863	0.735323	11.5923	6.04022	0.579824	0.678275	100
8 days 200 ppm	Col-0	4.97926	1.34237	4.75356	5.86097	0.393597	25.5814	16.3414	22.2053	0.0880008	0.180872	0.0624173	0.737021	10.7663	5.40587	0.513746	0.787898	100
8 days 200 ppm	gox2.1	4.25824	1.04217	4.79591	6.80386	0.548254	27.3099	16.3336	19.4352	0.0943544	0.159054	0.0558615	0.740901	11.6658	5.61404	0.500381	0.642575	100
8 days 200 ppm	gox2.1	4.12983	2.21037	6.52769	5.99083	0.435952	23.8644	17.8273	19.3414	0.0924563	0.175473	0.049114	0.800718	12.5599	4.78188	0.524029	0.688695	100
8 days 200 ppm	gox2.1	5.06279	0.98167	3.9129	7.67719	0.395126	20.3996	19.2825	21.3684	0.0885633	0.165598	0.0591385	0.744969	13.3305	5.39024	0.504829	0.636016	100
8 days 200 ppm	gox2.2	2.94282	0.986494	4.56773	4.31844	0.397665	19.4972	15.871	31.1977	0.0869201	0.163375	0.0378138	0.851045	13.7254	3.87874	0.860485	0.617237	100
8 days 200 ppm	gox2.2	3.95103	0.857863	4.36501	4.25143	0.445677	18.9108	16.4768	29.8581	0.0997855	0.167855	0.0273976	0.815972	14.0687	4.19644	0.89982	0.607369	100
8 days 200 ppm	gox2.2	3.43596	1.37669	5.57319	4.57658	0.48611	21.2746	15.6646	25.9698	0.0618906	0.134913	0.0623327	0.767009	15.7267	3.78892	0.599091	0.501613	100
8 days 200 ppm	gox1	3.78604	3.21349	8.8852	3.57843	0.528426	23.1992	12.9028	21.3479	0.0917906	0.243997	0.0544899	0.804044	15.6967	4.01383	0.521908	1.13167	100
8 days 200 ppm	gox1	2.36185	0.744185	5.55024	2.04673	0.441577	22.6013	10.8012	32.8187	0.0966134	0.124106	0.0321487	0.837917	17.108	3.18815	0.829197	0.417954	100
8 days 200 ppm	gox1	3.53366	1.61715	6.03914	3.01395	0.429893	24.8179	12.157	26.619	0.0860927	0.123513	0.0281165	0.700087	15.9836	3.69595	0.608023	0.546895	100
